# Supplementary material for: Perfect nematic order in confined monolayers of spindle-shaped cells
Source: Royal Society of Chemistry journal article supplement (doi:10.1039/c3sm52323c), 2013-10-04

# Perfect nematic order in confined monolayers of spindle-shaped cells

## Supplementary Figures

## Supplementary Figure 1

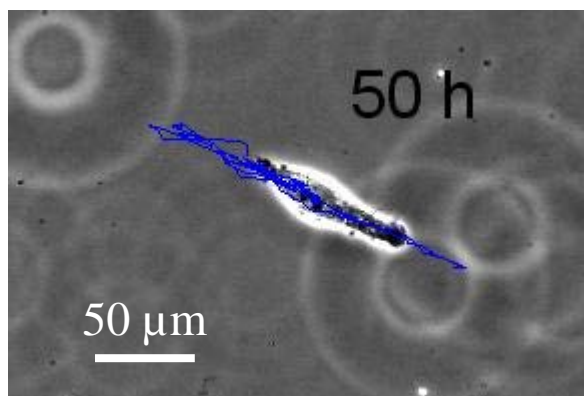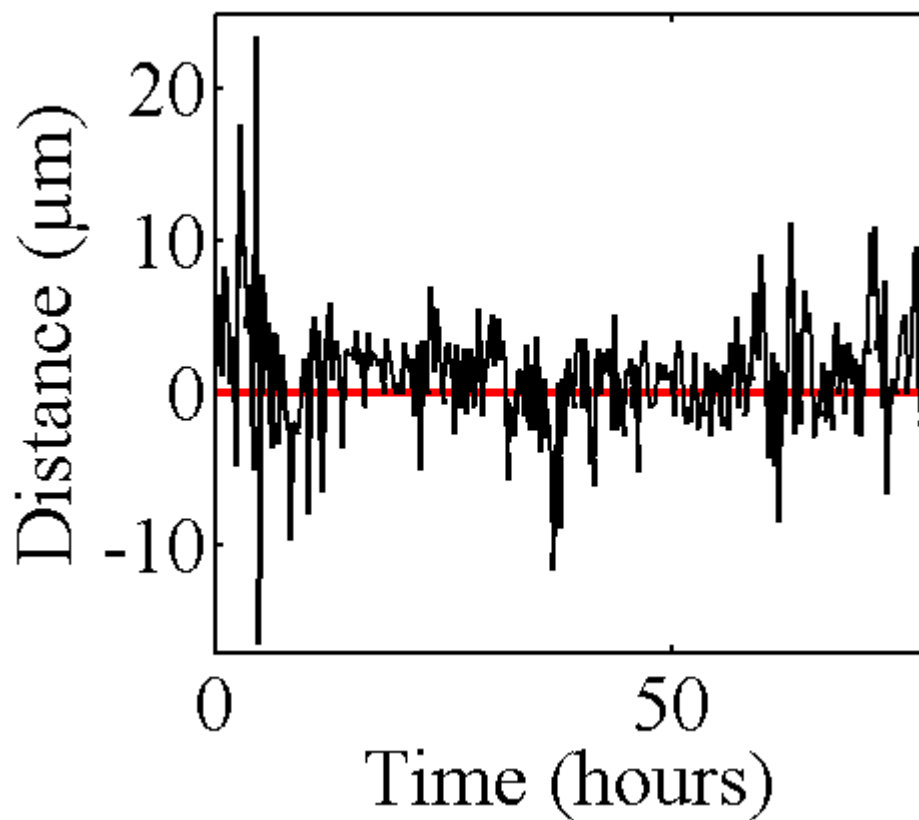

## Supplementary Figure 2

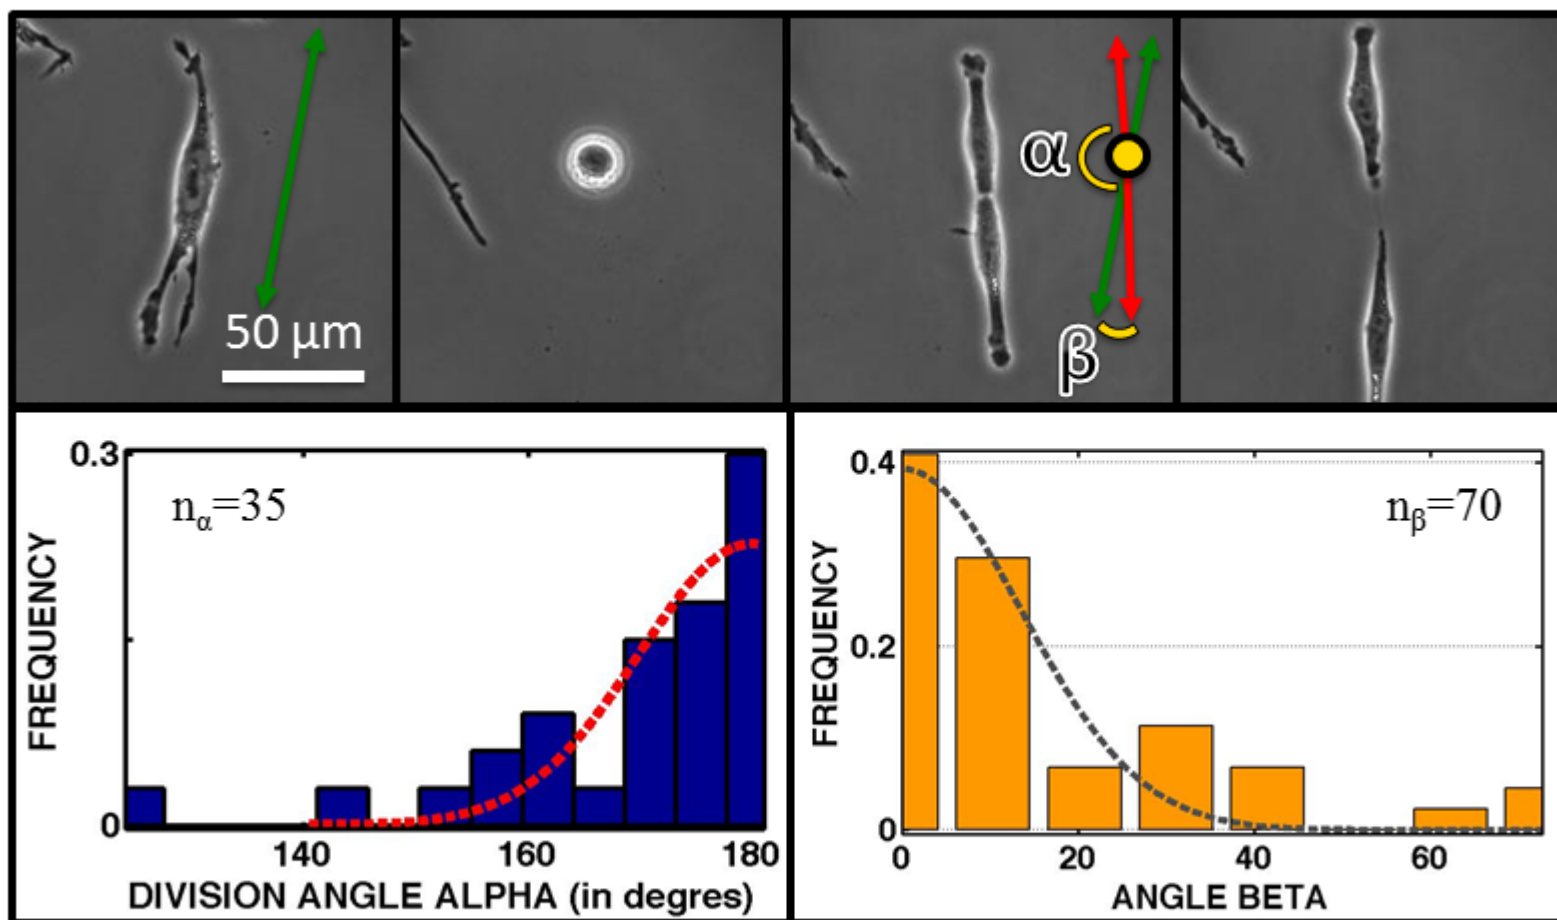

## Supplementary Figure 3

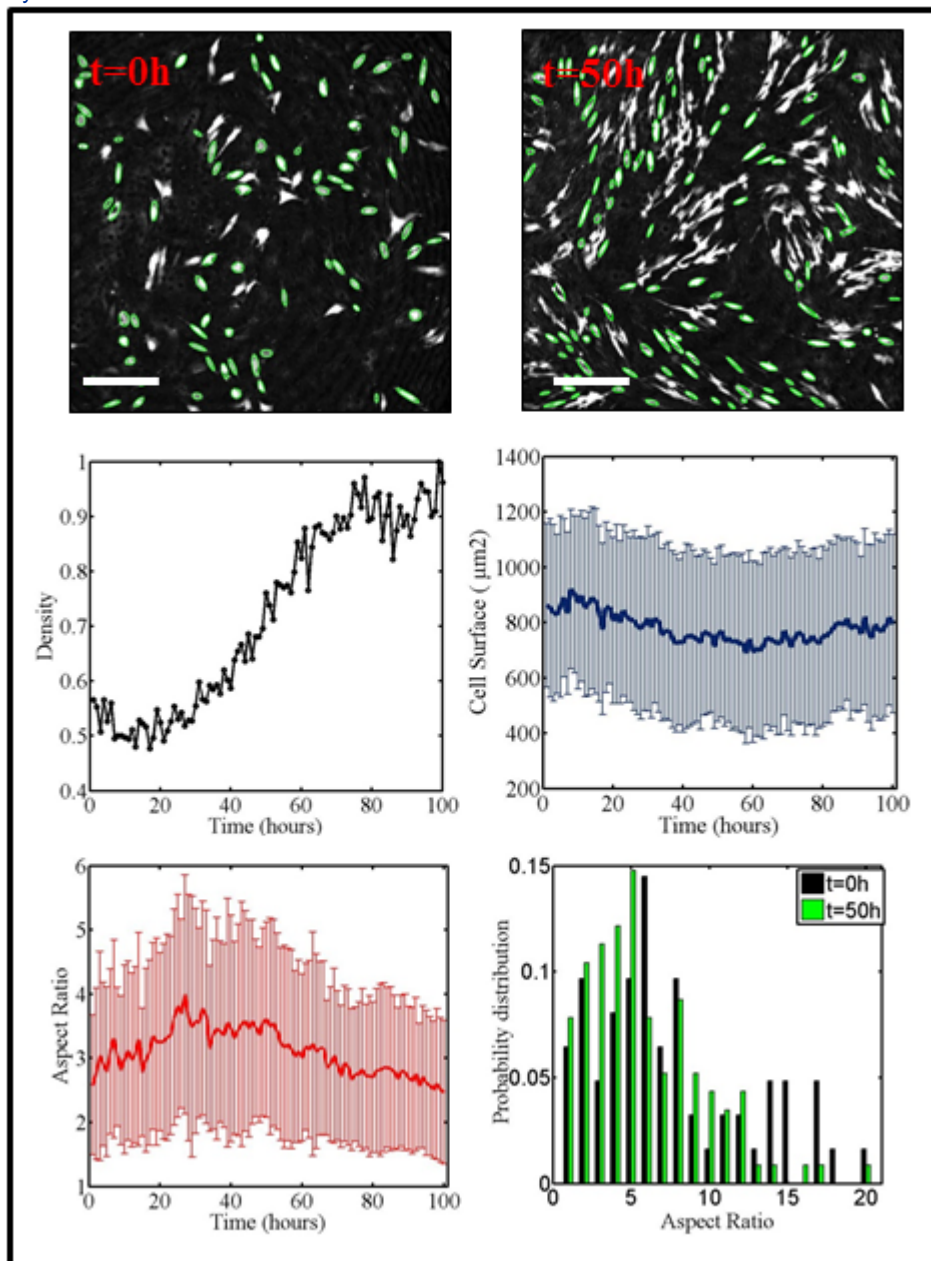

Scale : 300  $\mu\text{m}$

## Supplementary Figure 4

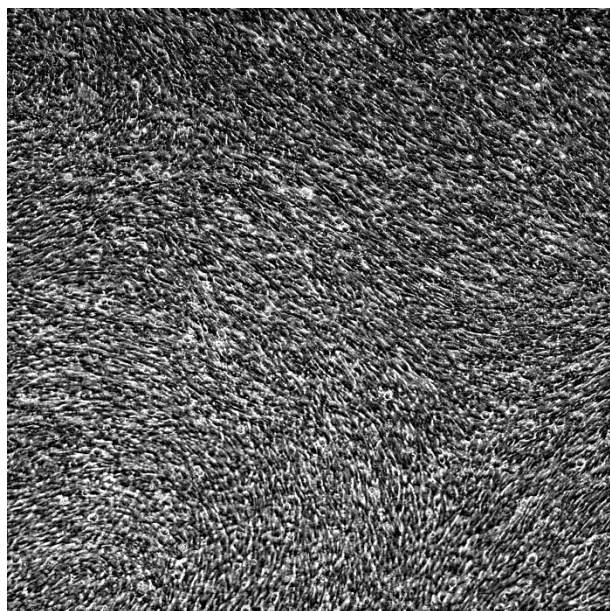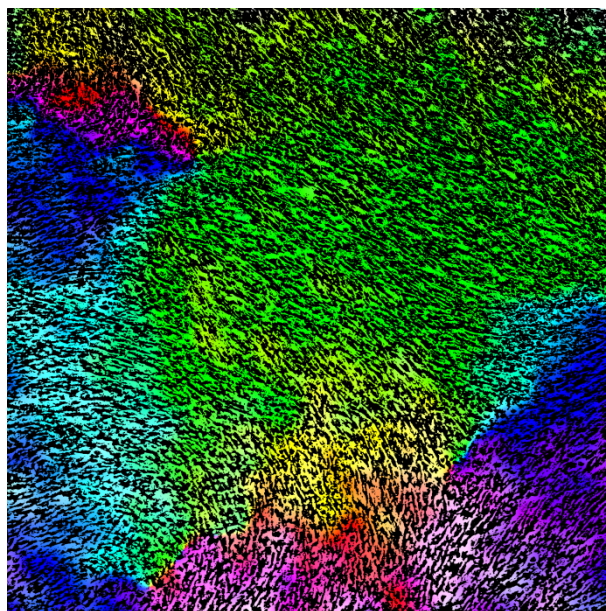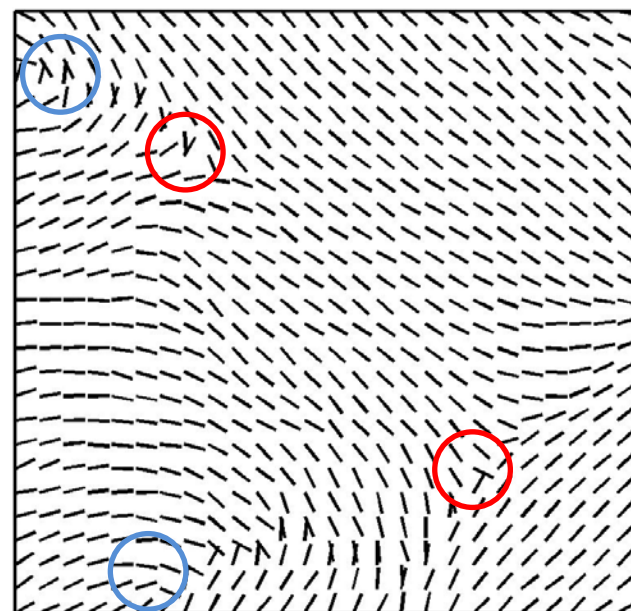

300  $\mu\text{m}$



## Supplementary Figure 5

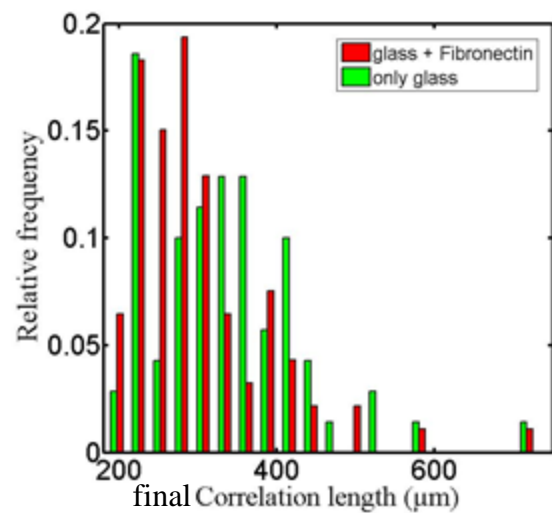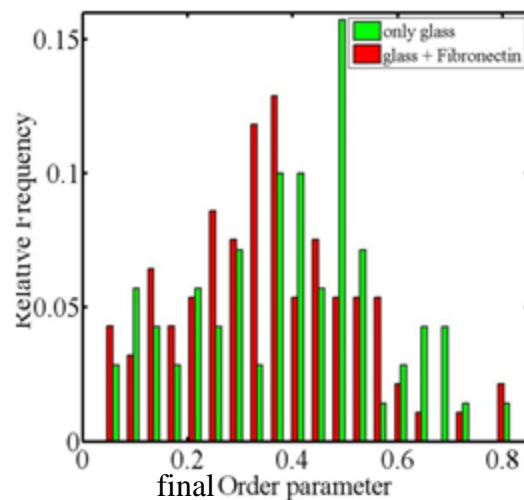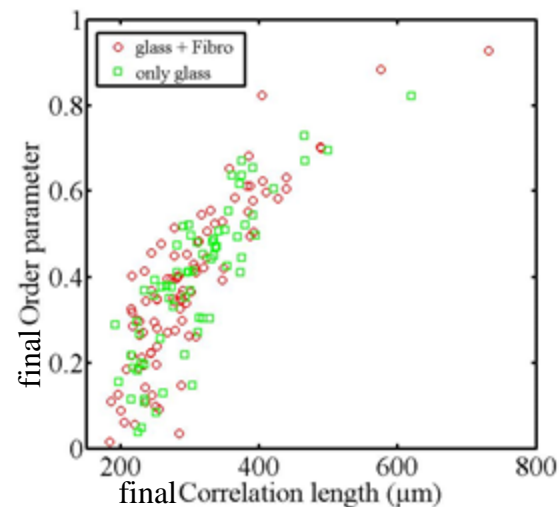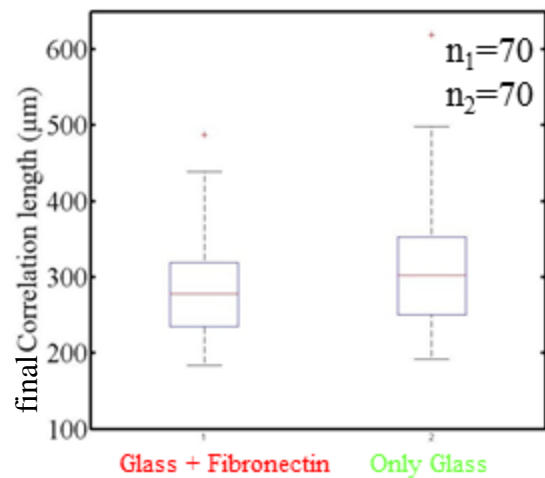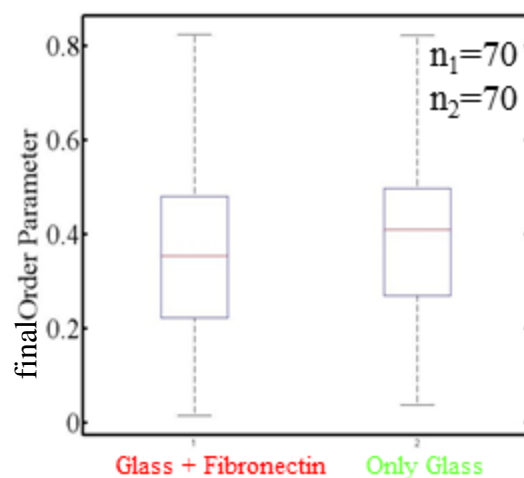

Supplement: c3sm52323c_2.pdf [file c3sm52323c_2.pdf]
